# Supplementary material for: Correlating the melting point alteration with the supramolecular structure in aripiprazole drug cocrystals
Source: Royal Society of Chemistry journal article supplement (doi:10.1039/c5ce02400e), 2016-01-01
Supplement: c5ce02400e1.pdf [file c5ce02400e1.pdf]

## Electronic Supporting Information (ESI)

### **Correlating the melting point alteration with the supramolecular structure in Aripiprazole drug cocrystals.**

**Jagadeesh Babu Nanubolu\* and Krishnan Ravikumar\***

Centre for X-ray Crystallography, CSIR-Indian Institute of Chemical Technology, Hyderabad, India, 500607. Corresponding author: E-mail: [jagadeesh81@gmail.com](mailto:jagadeesh81@gmail.com) and [sshiya@yahoo.co.in](mailto:sshiya@yahoo.co.in)  
Telephone: +91 (0) 4027193118 Fax +91 (0)4027193118.

**Table S1.** Important vibrational modes observed in aripiprazole and its cocrystals. All peak positions are referred in  $\text{cm}^{-1}$  unit scale.

| Solid form                     | C=O stretch | N-H stretch  | O-H stretch                                   | C-H stretch | C=C stretch |
|--------------------------------|-------------|--------------|-----------------------------------------------|-------------|-------------|
| Aripiprazole                   | 1679        | 3471<br>3322 | -                                             | 3196        | 1625        |
| Aripiprazole-Resorcinol, I     | 1653        | 3298         | 3584 , 3487<br>3000-3500<br>(broad)           | 3198        | 1626        |
| Aripiprazole-Catechol, II      | 1673        | 3316         | 3633, 3528<br>3000-3500<br>(broad)            | 3198        | 1626        |
| Aripiprazole-Hydroquinone, III | 1663        | 3319         | 3000-3500<br>(broad)                          | 3197        | 1626        |
| Aripiprazole-Pyrogallol, IV    | 1652        | 3295         | 3659, 3555<br>3000-3500<br>(broad)            | 3197        | 1627        |
| Aripiprazole-Phloroglucinol, V | 1652        | 3289         | 3646, 3575,<br>3491 ,<br>3000-3500<br>(broad) | 3198        | 1626        |

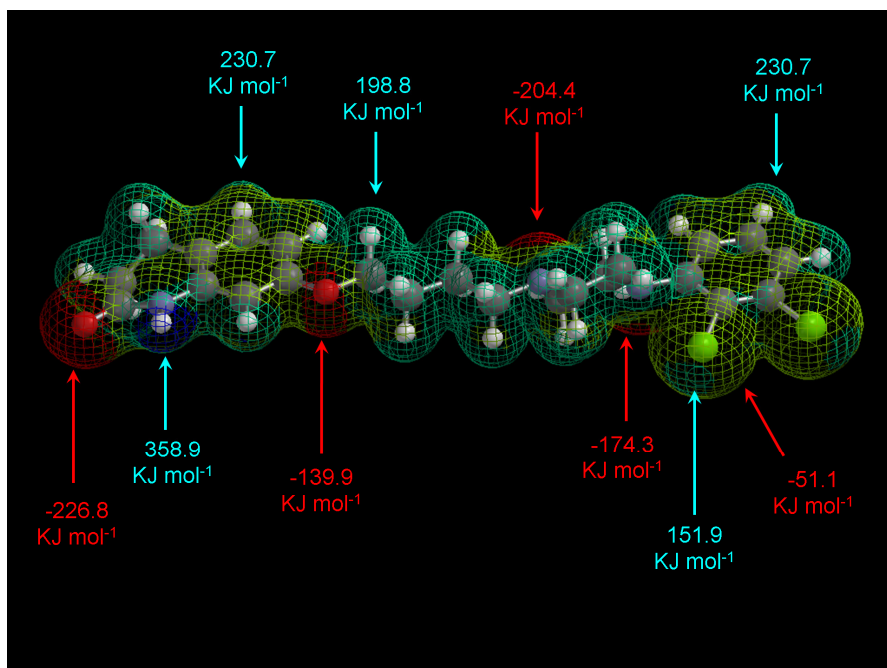

**Fig.S1** Electrostatic surface potential (ESP) map on the energy minimized structure of aripiprazole. The red regions indicate electron rich and blue region indicates electron deficient and the colors from blue to green forms the continuum. The chlorine atoms play a dual role of both donor and acceptor due to the anisotropy of the electron distribution on the chlorine atom with  $-51.1 \text{ KJ mol}^{-1}$  at the periphery and  $+151.9 \text{ KJ mol}^{-1}$  at the centre of the halogen atom.

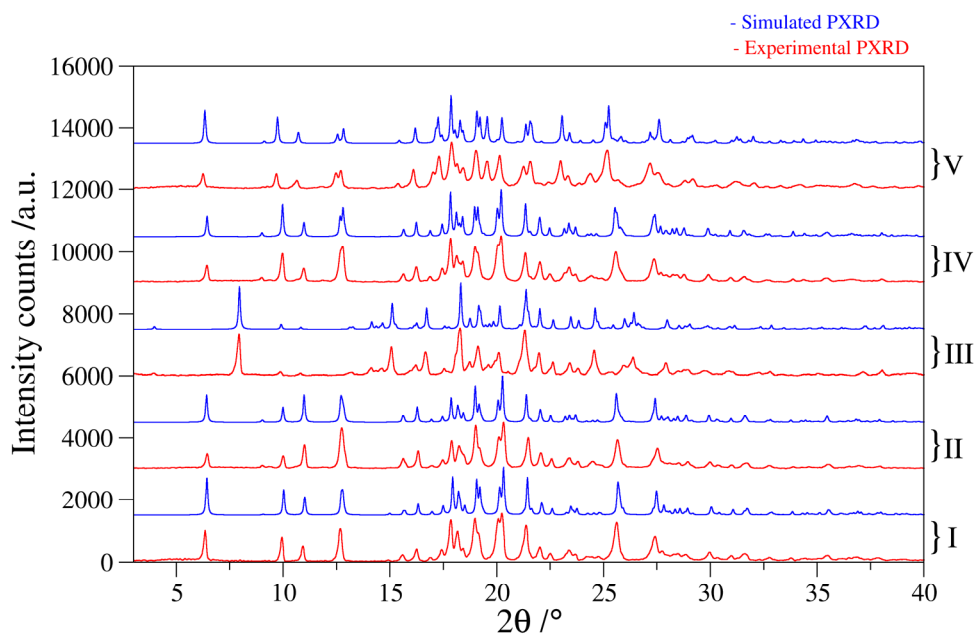

**Fig.S2** Comparison of simulated PXRD patterns with experimental PXRD patterns of five cocrystals.

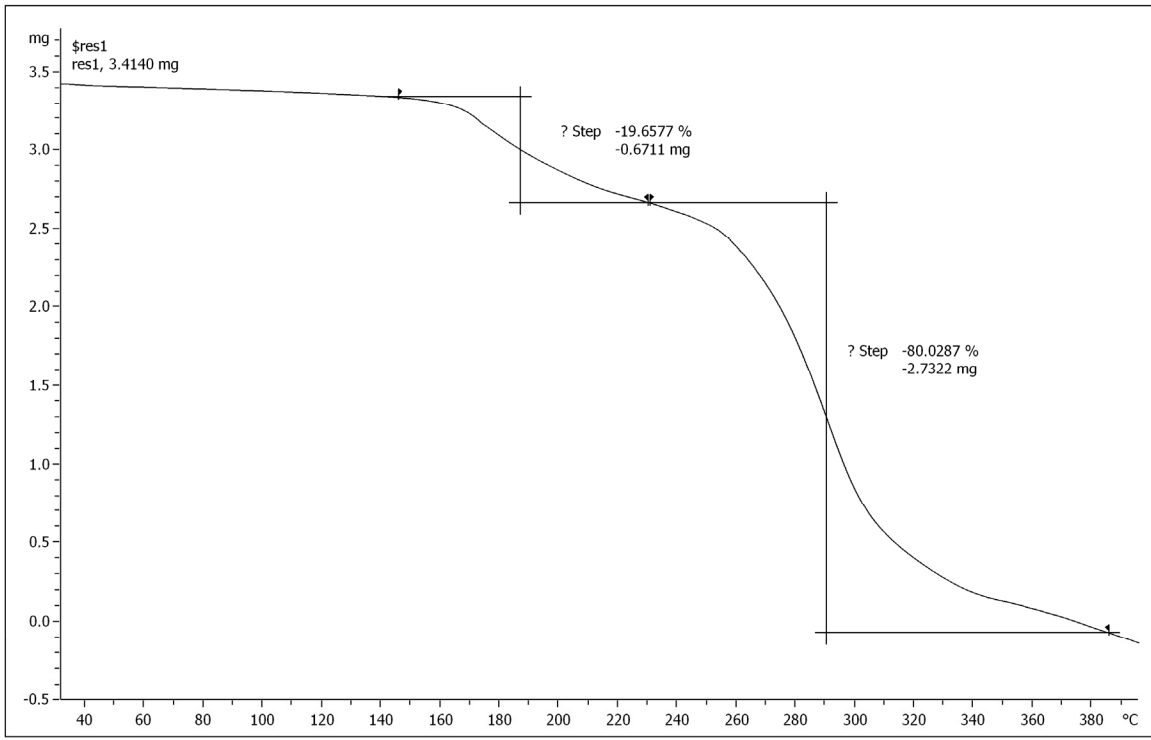

METTLER TOLEDO

STAR<sup>e</sup> SW 14.00

(a)

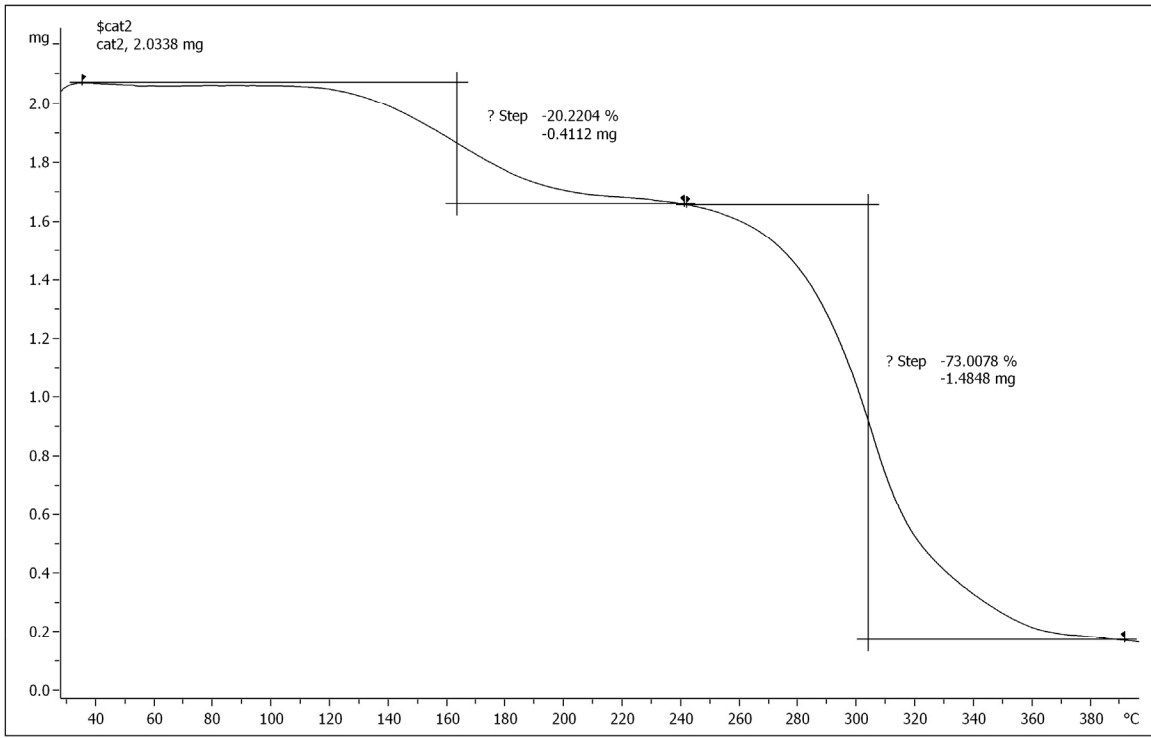

METTLER TOLEDO

STAR<sup>e</sup> SW 14.00

(b)

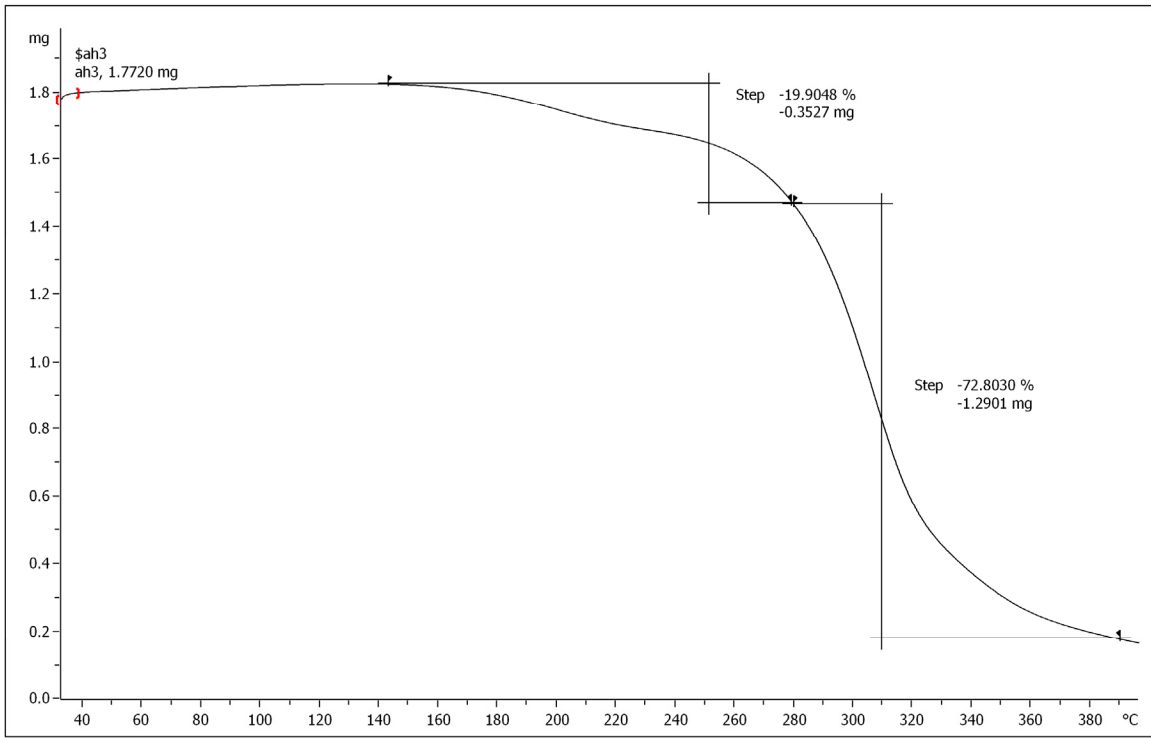

METTLER TOLEDO

STAR<sup>e</sup> SW 14.00

(c)

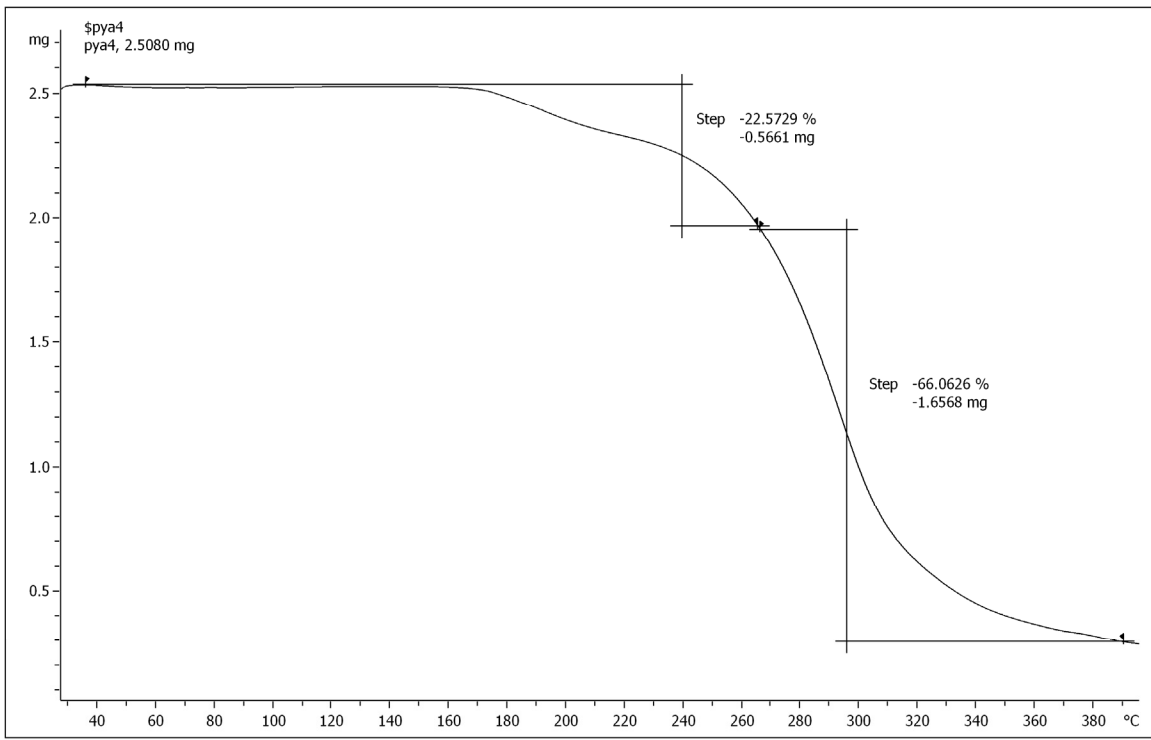

METTLER TOLEDO

STAR<sup>e</sup> SW 14.00

(d)

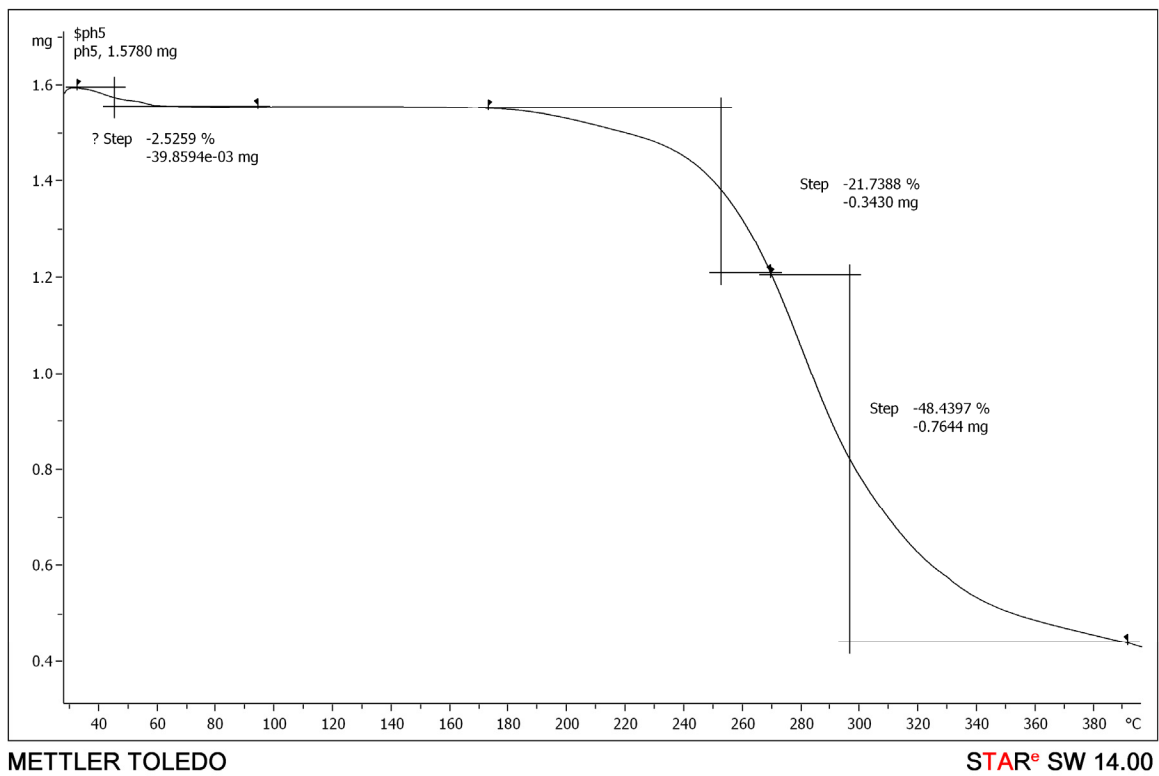

(e)

**Fig. S3** (a) Thermo gravimetric curve of cocystal I. (b) Thermo gravimetric curve of cocystal II. (c) Thermo gravimetric curve of cocystal III. (d) Thermo gravimetric curve of cocystal IV. (e) Thermo gravimetric curve of cocystal V.

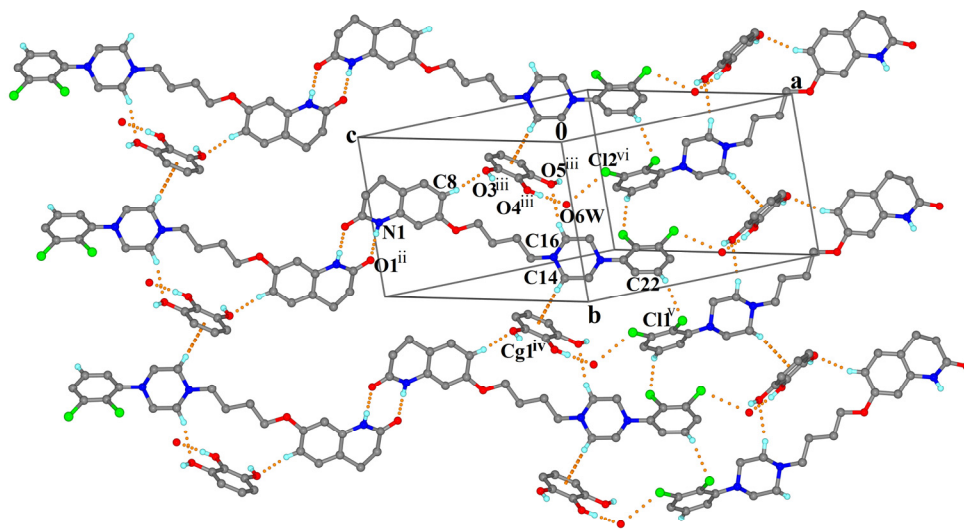

(a)

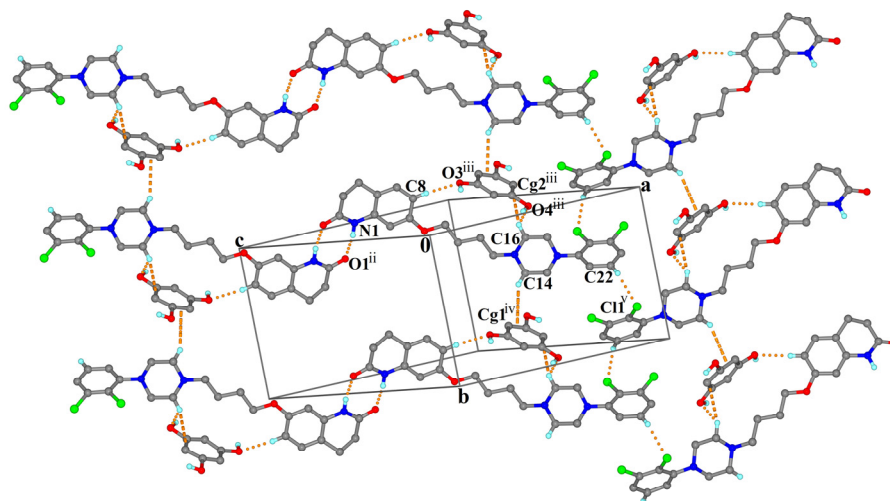

(b)

**Fig.S4** (a) Cocystal IV, extension of centrosymmetric amide N1–H1···O1 dimer into a 2D layered structure by a combination of C14–H14B···Cg1, C8–H8···Cg2, C16–H16A···O5, C8–H8···O3, C22–H22···Cl1, O4–H4O···O5W, Cl2···O6W interactions. Symmetry codes are, <sup>i</sup>  $-1-x, 1/2+y, 1/2-z$ ; <sup>ii</sup>  $-1-x, 1-y, 1-z$ ; <sup>iii</sup>  $-x, -1/2+y, 1/2-z$ ; <sup>iv</sup>  $-x, 1/2+y, 1/2-z$ ; <sup>v</sup>  $1-x, 1/2+y, 1/2-z$ ; <sup>vi</sup>  $-1+x, y, z$ ; Cg1 is centroid of C24–C29 atoms and Cg2 is centroid of C24/C29 atoms. (b) Cocystal V, extension of centrosymmetric amide N1–H1···O1 dimer into a 2D layered structure by a combination of C14–H14B···Cg1, C16–H16A···Cg2, C17–H17B···O4, C8–H8···O3, C22–H22···Cl1 interactions. Symmetry codes are, <sup>i</sup>  $-x, 1/2+y, 1/2-z$ ; <sup>ii</sup>  $-x, -y, 1-z$ ; <sup>iii</sup>  $1-x, -1/2+y, 1/2-z$ ; <sup>iv</sup>  $1-x, 1/2+y, 1/2-z$ ; <sup>v</sup>  $2-x, 1/2+y, 1/2-z$ ; <sup>vi</sup>  $-1+x, -1+y, z$ ; <sup>vii</sup>  $1-x, -y, 1-z$ ; Cg1 is the centroid of C28/C29 atoms; Cg2 is of C26/C27 atoms; Cg3 is of C18–C23 atoms.

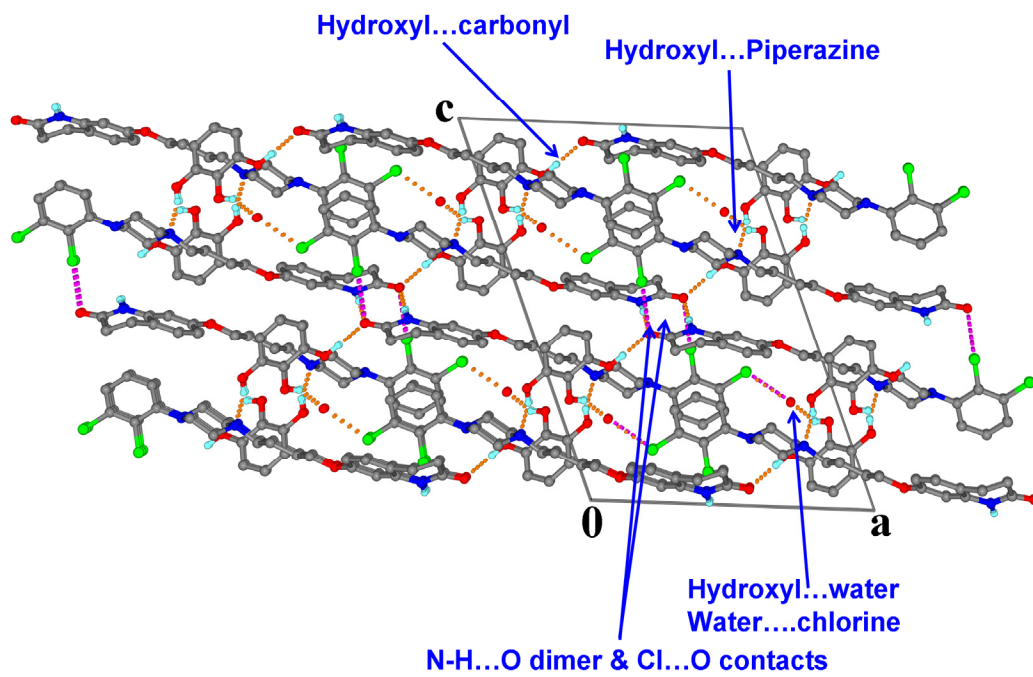

(a)

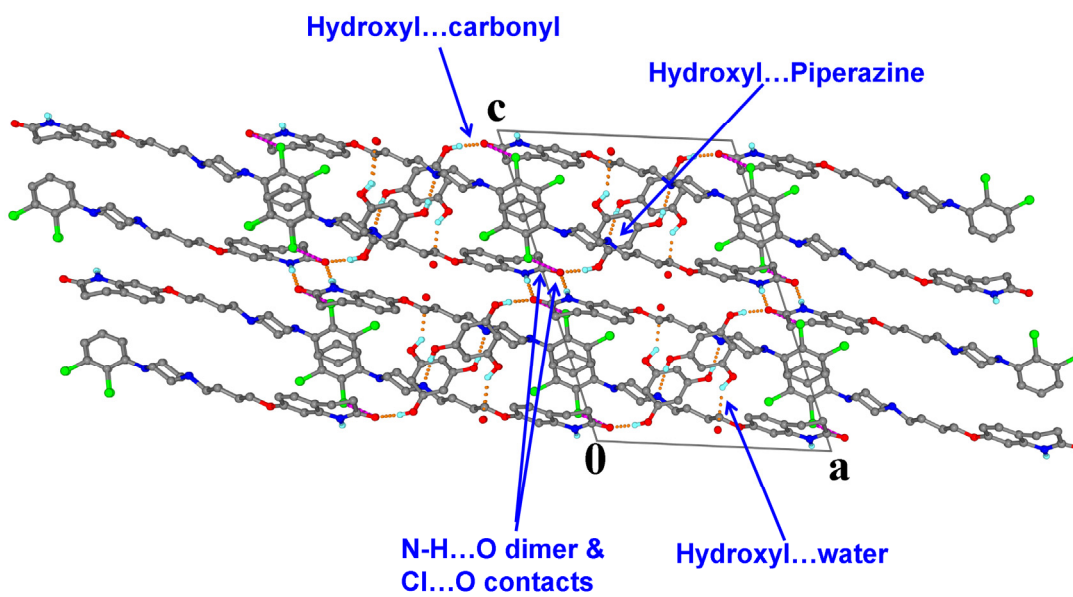

(b)

**Fig.S5** (a) Cocystal IV. (b) Cocystal V. The three dimensional interlayer bonding in two cocrystals mediated through various interactions is shown in the picture.
